# Supplementary material
Source: PubMed Central journal article supplement (PMC8492506)
Supplement: NIHMS1718796-supplement-2.pdf [file NIHMS1718796-supplement-2.pdf]

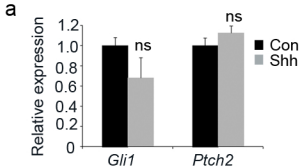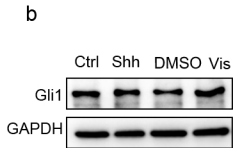

**Supplementary Figure 1 Hedgehog pathway is not activated in U251 cells**

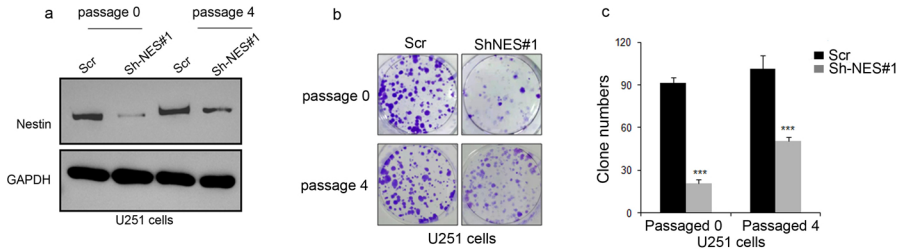

Supplementary figure 2 Colony formation from passaged U251 cells after Nestin knockdown

**a**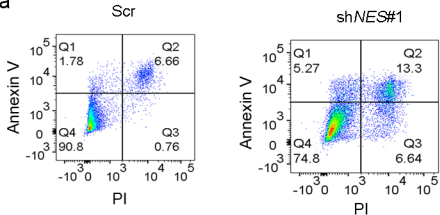**b**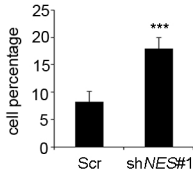

Supplementary Figure 3 GBM cells from PDX undergo apoptosis after Nestin knockdown

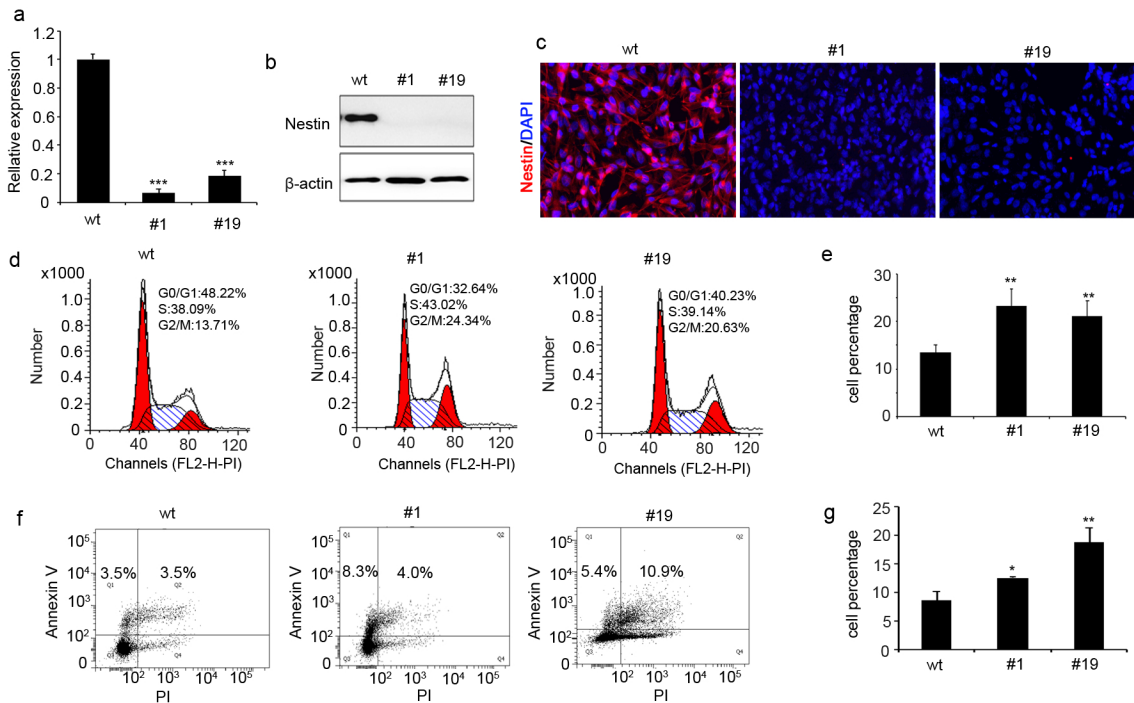

Supplementary Figure 4 Nestin deletion causes G2/M arrest and apoptosis in U251 cells

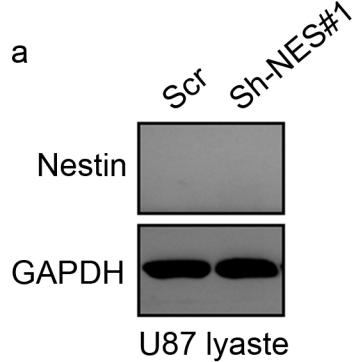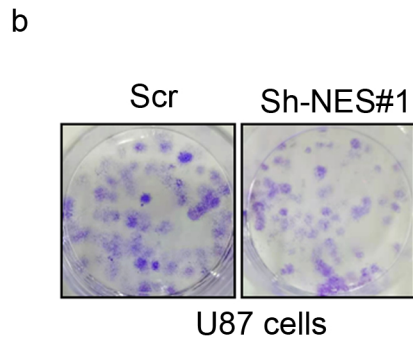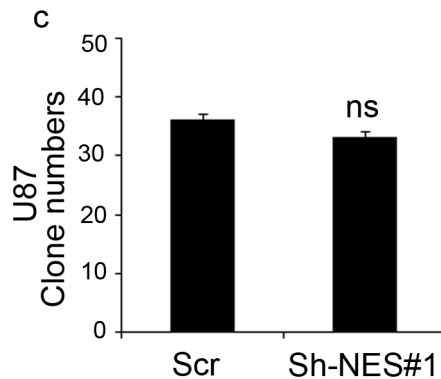

Supplementary figure 5 Colony formation from U87 cells after transduction with Nestin shRNA

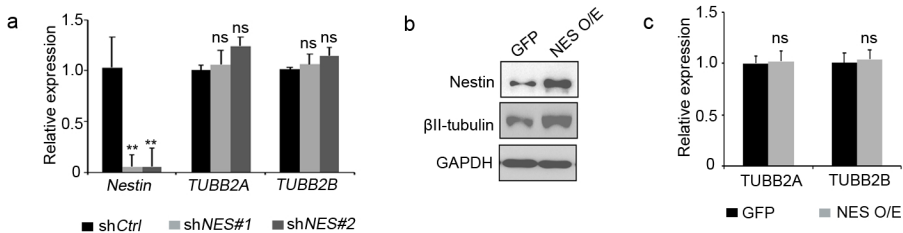

Supplementary figure 6 No alterations in the mRNA expression of *TUBB2A* and *TUBB2B* in U251 cells after Nestin manipulation

**a**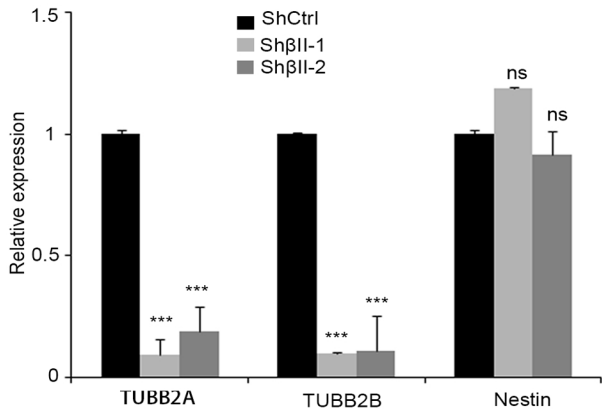**b**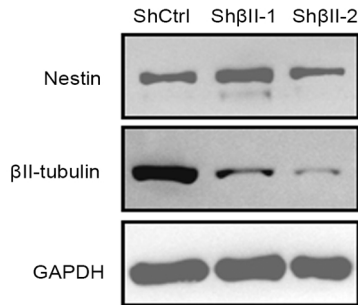

Supplementary figure 7 No alterations in the expression of Nestin mRNA and protein in U251 cells after  $\beta$ II-tubulin knockdown
